# Supplementary material
Source: PubMed Central journal article supplement (PMC5367520)
Supplement: NIHMS71920-supplement-Supplementary_data.pdf [file NIHMS71920-supplement-Supplementary_data.pdf]

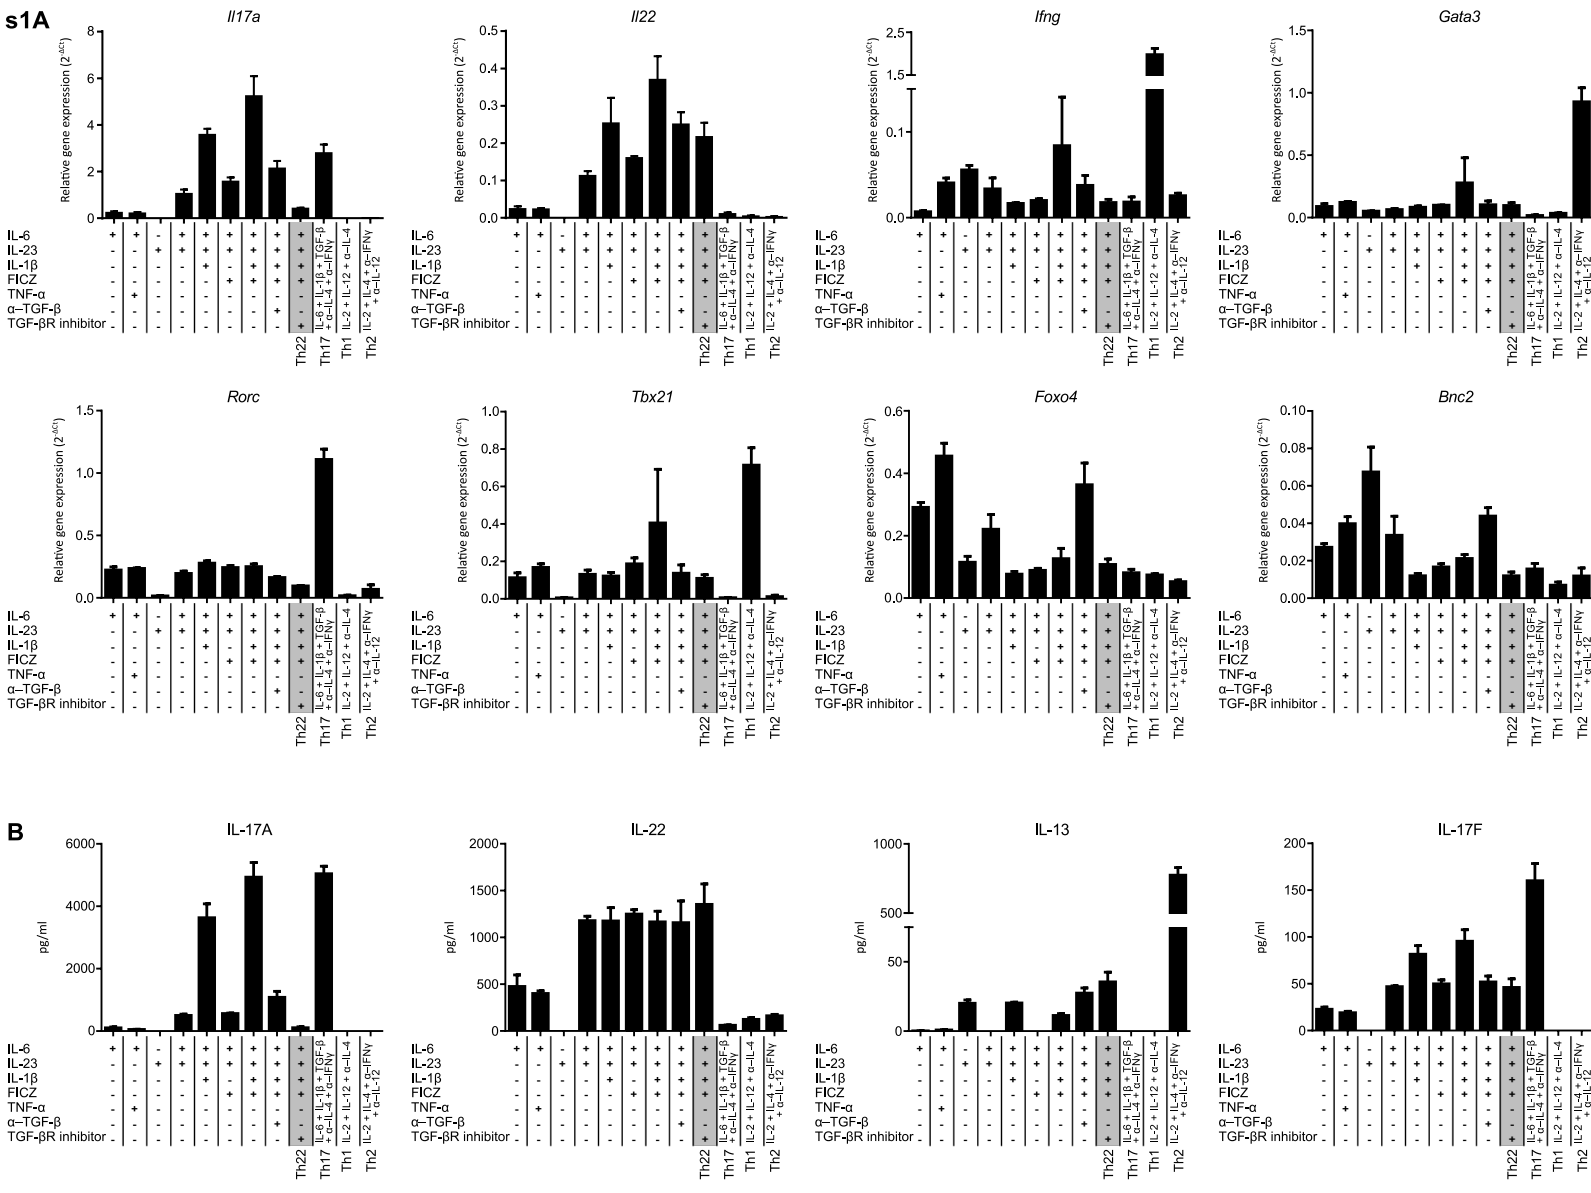

**B**

pg/ml

**IL-17A**

**IL-22**

**IL-13**

**IL-17F**

IL-6  
IL-23  
IL-1 $\beta$   
FICZ  
TNF- $\alpha$   
 $\alpha$ -TGF- $\beta$   
TGF- $\beta$ R inhibitor

Th22  
Th17  
Th1  
Th2

IL-6 + IL-1 $\beta$  + TGF- $\beta$   
+  $\alpha$ -IL-4 +  $\alpha$ -IFN $\gamma$   
IL-2 + IL-12 +  $\alpha$ -IL-4  
IL-2 + IL-4 +  $\alpha$ -IFN $\gamma$

IL-6  
IL-23  
IL-1 $\beta$   
FICZ  
TNF- $\alpha$   
 $\alpha$ -TGF- $\beta$   
TGF- $\beta$ R inhibitor

Th22  
Th17  
Th1  
Th2

IL-6 + IL-1 $\beta$  + TGF- $\beta$   
+  $\alpha$ -IL-4 +  $\alpha$ -IFN $\gamma$   
IL-2 + IL-12 +  $\alpha$ -IL-4  
IL-2 + IL-4 +  $\alpha$ -IFN $\gamma$

IL-6  
IL-23  
IL-1 $\beta$   
FICZ  
TNF- $\alpha$   
 $\alpha$ -TGF- $\beta$   
TGF- $\beta$ R inhibitor

Th22  
Th17  
Th1  
Th2

IL-6 + IL-1 $\beta$  + TGF- $\beta$   
+  $\alpha$ -IL-4 +  $\alpha$ -IFN $\gamma$   
IL-2 + IL-12 +  $\alpha$ -IL-4  
IL-2 + IL-4 +  $\alpha$ -IFN $\gamma$

**Supplementary Figure 1: Gene expression and cytokine production of *in vitro* generated Th22 cells.**

Gene expression of naïve Th cells differentiated for 3 days under varying polarizing conditions was determined for the gene indicated (A). Expression is normalized relative to the housekeeping gene *Hprt*. Cytokine levels in culture supernatant of naïve Th2 cells differentiated for 3 days under varying polarizing conditions was determined for IL-17A, IL-22, IL-13 and IL-17F (B). Error bars represent SEM (n=6 per group from 3 independent experiments).

**s2A**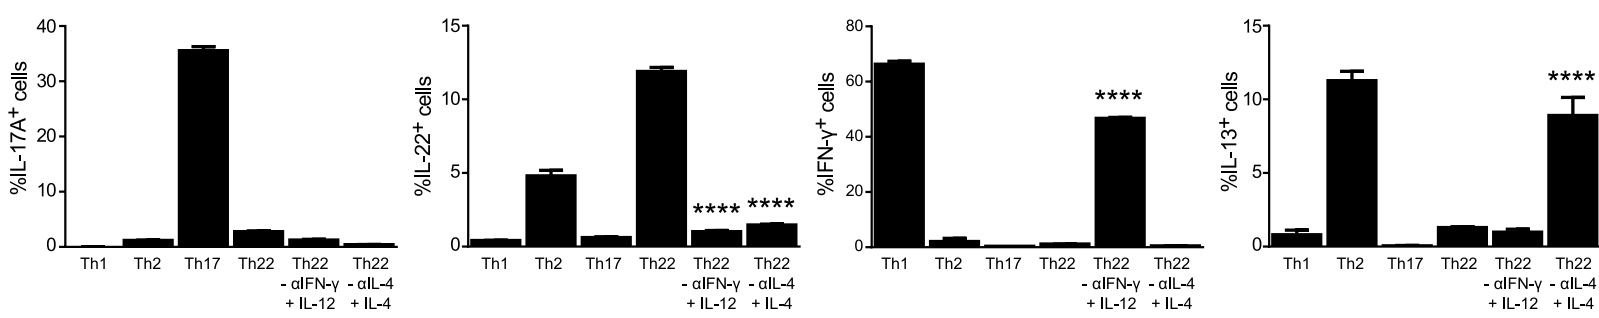**B**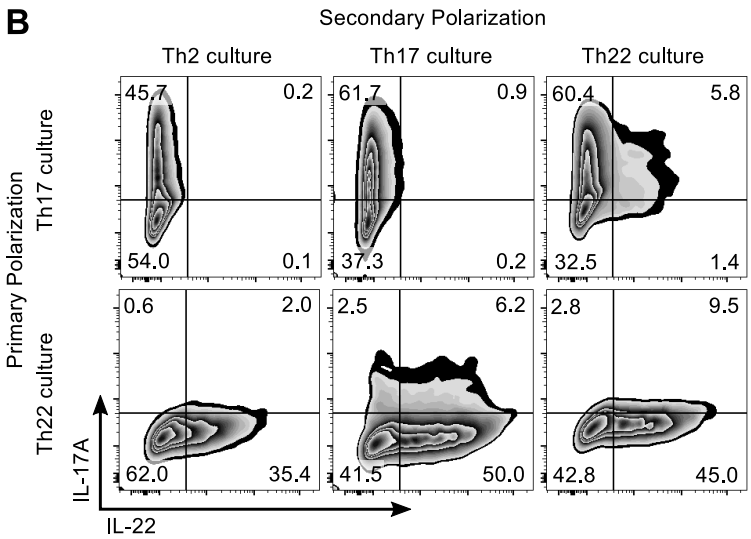**C**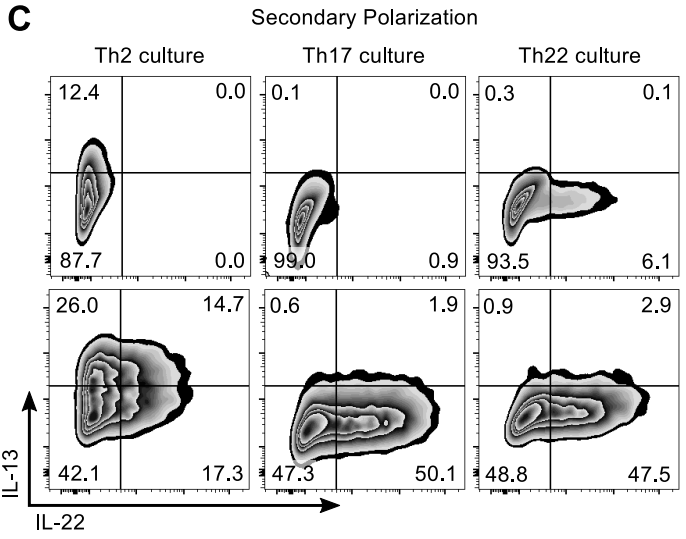**D**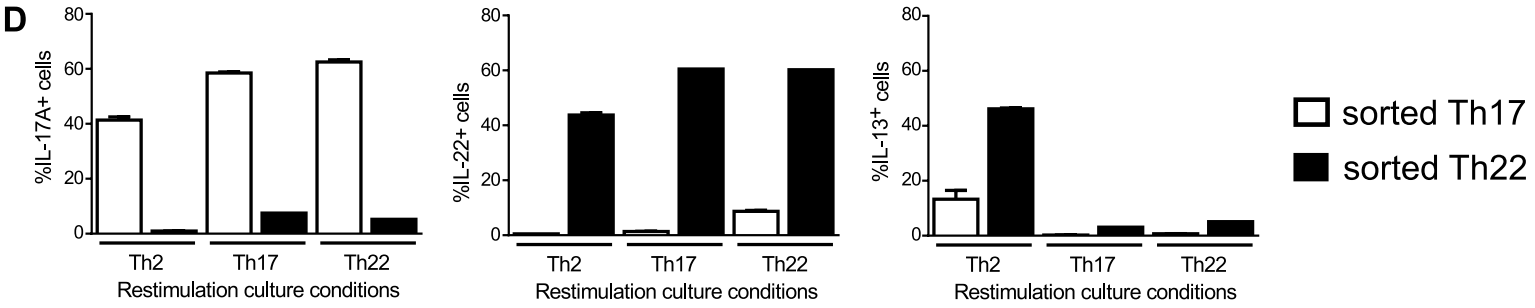

**Supplementary Figure 2: IL-4 or IL-12 administration inhibits Th22 differentiation and sorted Th22 cells re-stimulated under Th2 conditions exhibit plasticity *in vitro*.**

Naïve Th cells were cultured for 3 days under Th1, Th2, Th17 or Th22 conditions or under Th22 conditions with either rIL-12 (10ng/ml) lacking anti-IFN-γ or rIL-4 (20ng/ml) lacking anti-IL-4. Percentage of IL-17A<sup>+</sup>, IL-22<sup>+</sup>, IFN-γ<sup>+</sup> and IL-13<sup>+</sup> cells are graphed (A). Cultures of enriched Th17 and Th22 cells were generated from IL-17eGFP x IL-22tdTomato reporter mice, using optimal polarizing conditions for the first 3 days, and cells sorted for Th17 cells (CD4<sup>+</sup>CD44<sup>+</sup>IL-17eGFP<sup>+</sup>) or Th22 cells (CD4<sup>+</sup>CD44<sup>+</sup>IL-17eGFP-IL-22tdTomato<sup>+</sup>). Purified Th17 and Th22 cells were re-stimulated under Th2, Th17 and Th22 conditions for a further 3 days and the expression of IL-17A, IL-22 and IL-13 determined. Representative plots of IL-17eGFP, IL-22tdTomato and IL-13 expression in re-stimulated, fixed Th17 and Th22 cells are shown (B/C). Cell populations in FACS plots are pre-gated on CD4<sup>+</sup>CD44<sup>+</sup> and viable cells. Quantification of IL-17A<sup>+</sup>, IL-22<sup>+</sup> and IL-13<sup>+</sup> cells in sorted Th17 and Th22 populations re-stimulated under Th2, Th17 and Th22 conditions (D). Error bars represent SEM (n=3 per group (A); 2 per group (D)).

**Supplementary Table I: Differentially expressed transcripts between Th17 and Th22 cells.** Gene transcription data generated using RNA isolated from sorted Th17 (CD4<sup>+</sup>CD44<sup>+</sup>IL-17eGFP<sup>+</sup>) and Th22 cells (CD4<sup>+</sup>CD44<sup>+</sup>IL-17eGFP<sup>-</sup>IL-22tdTomato<sup>+</sup>) quantified by mouse whole transcriptome microarray. All transcripts with >2-fold difference and p<0.05 are presented.

| Transcripts upregulated in Th17 cells (vs. Th22 cells) |                       |                         |                           | Transcripts upregulated in Th22 cells (vs. Th17 cells) |                       |                         |                           |
|--------------------------------------------------------|-----------------------|-------------------------|---------------------------|--------------------------------------------------------|-----------------------|-------------------------|---------------------------|
| Gene symbol                                            | Transcript Cluster ID | Fold Change (Th17/Th22) | ANOVA p-value (Th17/Th22) | Gene symbol                                            | Transcript Cluster ID | Fold Change (Th22/Th17) | ANOVA p-value (Th22/Th17) |
| Gpr15                                                  | 17331212              | 15.90                   | 0.000                     | Gzmb                                                   | 17307033              | 38.14                   | 0.000                     |
| Igkv6-23                                               | 17459423              | 15.41                   | 0.000                     | Hamp                                                   | 17489363              | 15.21                   | 0.004                     |
| Nt5e                                                   | 17520073              | 13.96                   | 0.000                     | Il22                                                   | 17237581              | 11.39                   | 0.013                     |
| Klrd1                                                  | 17463567              | 13.85                   | 0.000                     | Il3                                                    | 17262823              | 11.24                   | 0.024                     |
| Il10                                                   | 17216990              | 12.11                   | 0.004                     | Ccl5                                                   | 17266946              | 8.60                    | 0.003                     |
| Ahr                                                    | 17280729              | 11.78                   | 0.002                     | Lum                                                    | 17236811              | 8.39                    | 0.002                     |
| Ccl20                                                  | 17214857              | 8.55                    | 0.030                     | Akr1c18                                                | 17290263              | 8.32                    | 0.007                     |
| Gm15655                                                | 17505903              | 8.45                    | 0.001                     | Trat1                                                  | 17330805              | 8.13                    | 0.004                     |
| Ly6g                                                   | 17312219              | 8.19                    | 0.041                     | Ms4a4b                                                 | 17357659              | 8.07                    | 0.002                     |
| Klre1                                                  | 17463557              | 8.03                    | 0.002                     | Gbp11                                                  | 17450515              | 7.99                    | 0.001                     |
| Serp1b1a                                               | 17291694              | 7.84                    | 0.001                     | Xaf1                                                   | 17252341              | 7.77                    | 0.001                     |
| Maf                                                    | 17513289              | 7.74                    | 0.000                     | Tnip3                                                  | 17459196              | 7.51                    | 0.001                     |
| Klrc2                                                  | 17471586              | 7.63                    | 0.013                     | Trim30d                                                | 17494408              | 7.32                    | 0.002                     |
| Il17a                                                  | 17211369              | 7.22                    | 0.013                     | Akr1c13                                                | 17284936              | 6.69                    | 0.008                     |
| Igk-V21                                                | 17459421              | 7.20                    | 0.001                     | Ifih1                                                  | 17385797              | 6.29                    | 0.001                     |
| Cldnd1                                                 | 17326438              | 6.39                    | 0.000                     | Il1r2                                                  | 17212174              | 6.25                    | 0.007                     |
| Art2a-ps                                               | 17493906              | 6.07                    | 0.002                     | Mndal                                                  | 17230067              | 5.90                    | 0.008                     |
| Il9                                                    | 17293013              | 5.93                    | 0.013                     | Gm5483                                                 | 17325329              | 5.58                    | 0.019                     |
| Tmem176b                                               | 17466624              | 5.86                    | 0.001                     | Nkg7                                                   | 17477101              | 5.58                    | 0.000                     |
| LOC102638993                                           | 17480924              | 5.76                    | 0.002                     | Lilr4b                                                 | 17233210              | 4.94                    | 0.001                     |
| Ctla2b                                                 | 17293348              | 5.60                    | 0.001                     | Gzma                                                   | 17296286              | 4.78                    | 0.004                     |
| Il17f                                                  | 17221627              | 5.53                    | 0.007                     | Slc17a6                                                | 17478459              | 4.52                    | 0.003                     |
| Pdpr                                                   | 17432440              | 5.49                    | 0.001                     | Ermn                                                   | 17385398              | 4.45                    | 0.015                     |
| Klrc1                                                  | 17471598              | 5.34                    | 0.003                     | Ifitm3                                                 | 17497718              | 4.44                    | 0.004                     |
| Gm22164                                                | 17308620              | 5.05                    | 0.000                     | Serp1b6b                                               | 17286354              | 4.40                    | 0.005                     |
| Myo3b                                                  | 17371574              | 4.86                    | 0.001                     | Gm5416                                                 | 17325335              | 4.34                    | 0.009                     |
| Cd86                                                   | 17330203              | 4.83                    | 0.004                     | Ifi44                                                  | 17411147              | 4.27                    | 0.008                     |
| Gm13994                                                | 17375587              | 4.78                    | 0.003                     | Il13                                                   | 17262695              | 4.14                    | 0.004                     |
| Klrc3                                                  | 17471578              | 4.76                    | 0.031                     | Gbp8                                                   | 17450434              | 4.13                    | 0.009                     |
| Klri2                                                  | 17471616              | 4.55                    | 0.014                     | Plxnc1                                                 | 17244439              | 3.99                    | 0.000                     |
| Tmem176a                                               | 17458393              | 4.49                    | 0.005                     | Epsti1                                                 | 17302141              | 3.95                    | 0.000                     |
| Aqp3                                                   | 17424119              | 4.34                    | 0.001                     | Ms4a4a                                                 | 17357640              | 3.90                    | 0.026                     |
| Dab2                                                   | 17309935              | 4.32                    | 0.006                     | Lilrb4a                                                | 17233226              | 3.84                    | 0.001                     |
| Nipal1                                                 | 17438062              | 4.25                    | 0.003                     | Inhba                                                  | 17285438              | 3.80                    | 0.010                     |
| Lbp                                                    | 17378827              | 4.08                    | 0.001                     | Sox5os3                                                | 17464192              | 3.63                    | 0.005                     |
| Ikzf3                                                  | 17268820              | 4.03                    | 0.001                     | Ms4a6d                                                 | 17362973              | 3.51                    | 0.014                     |
| Rbp1                                                   | 17520624              | 3.92                    | 0.016                     | Gbp9                                                   | 17450448              | 3.48                    | 0.000                     |
| Ctsw                                                   | 17361605              | 3.76                    | 0.000                     | Egfr                                                   | 17247389              | 3.43                    | 0.004                     |
| LOC102633880                                           | 17292026              | 3.74                    | 0.000                     | Ebf1                                                   | 17248691              | 3.41                    | 0.004                     |
| Ust                                                    | 17239102              | 3.71                    | 0.000                     | Dgkk                                                   | 17532755              | 3.37                    | 0.003                     |
| Lgr4                                                   | 17374098              | 3.67                    | 0.002                     | Gbp4                                                   | 17450461              | 3.37                    | 0.002                     |
| Rb1                                                    | 17308600              | 3.53                    | 0.000                     | Nrn1                                                   | 17291874              | 3.37                    | 0.002                     |
| Alpk2                                                  | 17355060              | 3.38                    | 0.000                     | Phf11b                                                 | 17307280              | 3.34                    | 0.000                     |
| Ldlrad4                                                | 17351559              | 3.38                    | 0.000                     | Tnfsf8                                                 | 17426356              | 3.31                    | 0.001                     |
| Cpox                                                   | 17326428              | 3.31                    | 0.000                     | Atf3                                                   | 17231033              | 3.26                    | 0.002                     |
| Myof                                                   | 17364280              | 3.28                    | 0.003                     | A1504432                                               | 17401530              | 3.24                    | 0.002                     |
| Cpd                                                    | 17266157              | 3.27                    | 0.001                     | Gm29719                                                | 17340532              | 3.22                    | 0.007                     |
| Sgk1                                                   | 17232055              | 3.24                    | 0.002                     | Batf3                                                  | 17220787              | 3.19                    | 0.005                     |
| Golm1                                                  | 17293237              | 3.23                    | 0.000                     | Mir155                                                 | 17326794              | 3.17                    | 0.017                     |
| Gm16033                                                | 17262050              | 3.22                    | 0.005                     | Tigit                                                  | 17330478              | 3.16                    | 0.012                     |
| Cd101                                                  | 17408470              | 3.21                    | 0.000                     | Trim30a                                                | 17494394              | 3.15                    | 0.004                     |
| H60b                                                   | 17232102              | 3.17                    | 0.024                     | 2010005H15Rik                                          | 17325339              | 3.13                    | 0.014                     |
| Il6st                                                  | 17289889              | 3.15                    | 0.004                     | St3gal1                                                | 17317675              | 3.13                    | 0.001                     |
| Tfap2a                                                 | 17292011              | 3.15                    | 0.037                     | Gm12158                                                | 17262013              | 3.10                    | 0.022                     |
| Aplp2                                                  | 17525263              | 3.01                    | 0.000                     | LOC73899                                               | 17360344              | 3.05                    | 0.027                     |

|               |          |      |       |               |          |      |       |
|---------------|----------|------|-------|---------------|----------|------|-------|
| Prnp          | 17376541 | 3.00 | 0.007 | Olfr60        | 17497641 | 3.05 | 0.013 |
| Tmeff1        | 17414017 | 3.00 | 0.001 | Sox5os2       | 17464187 | 3.05 | 0.026 |
| lyd           | 17231358 | 2.97 | 0.008 | Coro2a        | 17425058 | 3.04 | 0.001 |
| Ppp1r14c      | 17231349 | 2.95 | 0.005 | Lrrk2         | 17314260 | 3.04 | 0.010 |
| Gm15511       | 17528548 | 2.93 | 0.012 | Casp1         | 17514424 | 3.02 | 0.003 |
| Lpar6         | 17301886 | 2.92 | 0.001 | Tnc           | 17426365 | 3.01 | 0.013 |
| Art2b         | 17493912 | 2.88 | 0.028 | Gstt1         | 17241934 | 3.00 | 0.002 |
| Sema6d        | 17375557 | 2.84 | 0.001 | Arhgef3       | 17298041 | 2.93 | 0.001 |
| Adam19        | 17248754 | 2.71 | 0.000 | Gm15135       | 17494322 | 2.93 | 0.002 |
| Paqr8         | 17211375 | 2.61 | 0.001 | Pparg         | 17461942 | 2.92 | 0.000 |
| Gm22836       | 17529227 | 2.59 | 0.014 | Tnp2          | 17328107 | 2.92 | 0.001 |
| LOC105247442  | 17222066 | 2.53 | 0.003 | Cd226         | 17352330 | 2.87 | 0.000 |
| A630023P12Rik | 17440530 | 2.50 | 0.009 | Trim34b       | 17481284 | 2.84 | 0.000 |
| Gm26065       | 17540497 | 2.49 | 0.014 | Il18          | 17517105 | 2.82 | 0.007 |
| Kynu          | 17370527 | 2.48 | 0.002 | Ddx60         | 17501440 | 2.80 | 0.023 |
| Peli2         | 17299401 | 2.48 | 0.001 | Isg15         | 17434023 | 2.80 | 0.014 |
| Acvr2a        | 17370598 | 2.46 | 0.001 | Fam71b        | 17248793 | 2.78 | 0.009 |
| Zfp318        | 17338087 | 2.46 | 0.000 | Usp18         | 17462437 | 2.78 | 0.013 |
| Crybg3        | 17331284 | 2.43 | 0.000 | Calcr1        | 17387385 | 2.76 | 0.002 |
| Emp1          | 17463781 | 2.43 | 0.004 | Il33          | 17358598 | 2.76 | 0.036 |
| Kctd12        | 17309154 | 2.43 | 0.008 | Stfa1         | 17325347 | 2.76 | 0.019 |
| Cd38          | 17437213 | 2.41 | 0.002 | H2-Q8         | 17337122 | 2.74 | 0.004 |
| Dst           | 17211587 | 2.36 | 0.000 | Mnda          | 17230078 | 2.74 | 0.001 |
| Gm23722       | 17222566 | 2.33 | 0.000 | Slnf1         | 17254171 | 2.72 | 0.005 |
| Tspan2        | 17401072 | 2.32 | 0.002 | Tm6sf1        | 17479736 | 2.72 | 0.007 |
| Txk           | 17448693 | 2.32 | 0.001 | Coch          | 17275378 | 2.71 | 0.012 |
| 4930486L24Rik | 17293338 | 2.30 | 0.024 | Cd274         | 17358544 | 2.70 | 0.003 |
| Cxcr6         | 17523642 | 2.29 | 0.003 | Serpine2      | 17224771 | 2.70 | 0.037 |
| Bcl6          | 17329433 | 2.28 | 0.001 | Crtam         | 17525856 | 2.68 | 0.010 |
| Ccr6          | 17333066 | 2.28 | 0.020 | Gm11998       | 17247332 | 2.67 | 0.002 |
| Pls1          | 17529764 | 2.26 | 0.021 | Clec2i        | 17463454 | 2.66 | 0.028 |
| Klrk1         | 17471565 | 2.25 | 0.005 | Dcn           | 17236800 | 2.66 | 0.019 |
| Gm17305       | 17251639 | 2.21 | 0.001 | Trim34a       | 17481274 | 2.65 | 0.000 |
| Slc4a4        | 17438832 | 2.21 | 0.000 | Mocos         | 17349016 | 2.64 | 0.002 |
| Vip           | 17231482 | 2.19 | 0.020 | Sox5          | 17472641 | 2.64 | 0.003 |
| Gm12205       | 17262586 | 2.18 | 0.017 | A630091E08Rik | 17493578 | 2.63 | 0.008 |
| Gm25494       | 17238636 | 2.18 | 0.017 | Mir31         | 17427131 | 2.63 | 0.032 |
| Igf1r         | 17479099 | 2.18 | 0.003 | Pyhin1        | 17219662 | 2.61 | 0.049 |
| Lrig1         | 17469217 | 2.18 | 0.006 | Crim1         | 17339801 | 2.58 | 0.002 |
| Pramef25      | 17432496 | 2.18 | 0.005 | Tespa1        | 17238705 | 2.58 | 0.002 |
| Gm24650       | 17424161 | 2.16 | 0.002 | Dock10        | 17224813 | 2.57 | 0.001 |
| Gm8465        | 17333076 | 2.15 | 0.010 | Gstt3         | 17241921 | 2.57 | 0.001 |
| Acpp          | 17530406 | 2.14 | 0.005 | Sox5os5       | 17464201 | 2.57 | 0.002 |
| Epb4112       | 17232283 | 2.14 | 0.001 | 2610528A11Rik | 17305163 | 2.54 | 0.000 |
| Gm23864       | 17344434 | 2.14 | 0.020 | Tmem45a       | 17331078 | 2.54 | 0.001 |
| Cyp1b1        | 17347448 | 2.13 | 0.014 | Gnal          | 17351426 | 2.53 | 0.006 |
| Zak           | 17371912 | 2.13 | 0.000 | Sytl3         | 17332932 | 2.53 | 0.007 |
| Olfr1445      | 17357891 | 2.10 | 0.033 | Ifi27         | 17278200 | 2.52 | 0.001 |
| Gfpt2         | 17249036 | 2.09 | 0.018 | Olfr266       | 17408970 | 2.52 | 0.000 |
| Gm25628       | 17311905 | 2.09 | 0.043 | LOC102633032  | 17404291 | 2.50 | 0.017 |
| Gsap          | 17435055 | 2.09 | 0.024 | Snx9          | 17332783 | 2.50 | 0.001 |
| Dnm3          | 17228906 | 2.08 | 0.018 | Atp8b4        | 17391056 | 2.49 | 0.010 |
| Gm11454       | 17379224 | 2.08 | 0.034 | Ntrk3         | 17492244 | 2.49 | 0.002 |
| Kctd14        | 17480349 | 2.07 | 0.006 | Il1rl2        | 17212199 | 2.48 | 0.000 |
| Procr         | 17378440 | 2.07 | 0.030 | Isg20         | 17479317 | 2.47 | 0.011 |
| Scpep1        | 17267601 | 2.07 | 0.001 | LOC102634350  | 17464184 | 2.41 | 0.017 |
| Dyrk4         | 17471179 | 2.04 | 0.019 | Slc39a6       | 17353153 | 2.41 | 0.000 |
| Myo1f         | 17336114 | 2.03 | 0.035 | Rab19         | 17457504 | 2.40 | 0.006 |
| Bmpr2         | 17213336 | 2.02 | 0.005 | Cdh17         | 17411848 | 2.39 | 0.004 |
| C920009B18Rik | 17232112 | 2.02 | 0.001 | 4833419F23Rik | 17348121 | 2.37 | 0.002 |

|               |          |      |       |
|---------------|----------|------|-------|
| Casp4         | 17514435 | 2.37 | 0.010 |
| Gm19705       | 17217825 | 2.37 | 0.000 |
| H2-DMb2       | 17336414 | 2.37 | 0.022 |
| 5430427O19Rik | 17536191 | 2.36 | 0.033 |
| Ifitm2        | 17497713 | 2.36 | 0.021 |
| Ido1          | 17508188 | 2.35 | 0.000 |
| Samd9l        | 17464534 | 2.35 | 0.037 |
| Kcna3         | 17401526 | 2.33 | 0.015 |
| Gm28053       | 17458377 | 2.32 | 0.018 |
| Tnfsf4        | 17218701 | 2.31 | 0.025 |
| Trim12a       | 17494353 | 2.30 | 0.008 |
| Gm26742       | 17350681 | 2.29 | 0.015 |
| Gramd1b       | 17525803 | 2.28 | 0.000 |
| Casp3         | 17501041 | 2.26 | 0.009 |
| Rnf19b        | 17418916 | 2.25 | 0.002 |
| Anxa1         | 17363407 | 2.24 | 0.003 |
| E430016F16Rik | 17492268 | 2.24 | 0.020 |
| Gm14718       | 17535045 | 2.24 | 0.005 |
| Gm16277       | 17360728 | 2.24 | 0.026 |
| Oas1a         | 17452126 | 2.24 | 0.043 |
| Gca           | 17371201 | 2.23 | 0.038 |
| Gm19261       | 17362970 | 2.23 | 0.001 |
| Zfp608        | 17354411 | 2.23 | 0.001 |
| C430002N11Rik | 17520582 | 2.22 | 0.003 |
| Penk          | 17423030 | 2.20 | 0.004 |
| Gbp7          | 17403224 | 2.19 | 0.006 |
| Prkca         | 17271168 | 2.19 | 0.002 |
| Peak1os       | 17517573 | 2.17 | 0.011 |
| Trim12c       | 17494325 | 2.16 | 0.008 |
| Cth           | 17411420 | 2.15 | 0.019 |
| Il12rb2       | 17467323 | 2.15 | 0.000 |
| Capsl         | 17310250 | 2.14 | 0.006 |
| Gzmc          | 17307025 | 2.14 | 0.018 |
| Cd80          | 17325608 | 2.13 | 0.014 |
| Fah           | 17493005 | 2.13 | 0.007 |
| Fhl2          | 17222642 | 2.13 | 0.004 |
| Rasgrp1       | 17389647 | 2.13 | 0.000 |
| Ckmt1         | 17375257 | 2.10 | 0.000 |
| Clcn5         | 17539797 | 2.10 | 0.037 |
| Oas1b         | 17441759 | 2.10 | 0.006 |
| Peak1         | 17527433 | 2.10 | 0.001 |
| B3gnt5        | 17323828 | 2.09 | 0.007 |
| Nkain1        | 17430645 | 2.09 | 0.038 |
| Gpr141        | 17290894 | 2.08 | 0.023 |
| Lrp1          | 17245923 | 2.08 | 0.006 |
| Man1a         | 17240880 | 2.08 | 0.001 |
| Abcg3         | 17450414 | 2.07 | 0.003 |
| Fasl          | 17228864 | 2.06 | 0.007 |
| Insl6         | 17363790 | 2.06 | 0.021 |
| Asah2         | 17363927 | 2.05 | 0.005 |
| Gm6904        | 17307260 | 2.05 | 0.044 |
| Il15ra        | 17367004 | 2.05 | 0.039 |
| Fam171b       | 17372552 | 2.03 | 0.006 |
| Gpm6b         | 17539611 | 2.03 | 0.045 |
| Ephx1         | 17230484 | 2.02 | 0.000 |
| Sik3          | 17516871 | 2.01 | 0.001 |
| Slamf1        | 17219407 | 2.01 | 0.000 |

---

**Supplementary Table II: Differential gene expression of predicted secreted transcripts from Th17 and Th22 cells.** Secretome prediction was performed using SignalPv4.1 and TargetPv1.1 analysis, to identify secreted products differentially expressed between Th17 and Th22 cells in the microarray dataset. A probability cut-off value of 0.8 was used for secretome prediction. All genes with >2-fold difference and p<0.05 are presented.

**Transcripts of predicted secreted proteins of Th17 cells**

| Gene Symbol | Fold Change (Th17/Th22) | ANOVA p-value (Th17/Th22) |
|-------------|-------------------------|---------------------------|
| Nt5e        | 13.96                   | 0.000                     |
| Il10        | 12.11                   | 0.004                     |
| Ccl20       | 8.55                    | 0.030                     |
| Il17a       | 7.22                    | 0.013                     |
| Il9         | 5.93                    | 0.013                     |
| Il17f       | 5.53                    | 0.007                     |
| Lbp         | 4.08                    | 0.001                     |
| Ctsw        | 3.76                    | 0.000                     |
| H60b        | 3.17                    | 0.024                     |
| Il6st       | 3.15                    | 0.004                     |
| Art2b       | 2.88                    | 0.028                     |
| Sema6d      | 2.84                    | 0.001                     |
| Adam19      | 2.71                    | 0.000                     |
| Vip         | 2.19                    | 0.020                     |
| Igf1r       | 2.18                    | 0.003                     |
| Lrig1       | 2.18                    | 0.006                     |
| Acpp        | 2.14                    | 0.005                     |
| Procr       | 2.07                    | 0.030                     |
| Scpep1      | 2.07                    | 0.001                     |
| Bmpr2       | 2.02                    | 0.005                     |

**Transcripts of predicted secreted proteins of Th22 cells**

| Gene Symbol   | Fold Change (Th22/Th17) | ANOVA p-value (Th22/Th17) |
|---------------|-------------------------|---------------------------|
| Gzmb          | 38.14                   | 0.000                     |
| Hamp          | 15.21                   | 0.004                     |
| Il22          | 11.39                   | 0.013                     |
| Il3           | 11.24                   | 0.024                     |
| Ccl5          | 8.60                    | 0.003                     |
| Lum           | 8.39                    | 0.002                     |
| Il1r2         | 6.25                    | 0.007                     |
| Lilr4b        | 4.94                    | 0.001                     |
| Gzma          | 4.78                    | 0.004                     |
| Il13          | 4.14                    | 0.004                     |
| Lilrb4a       | 3.84                    | 0.001                     |
| Inhba         | 3.80                    | 0.010                     |
| Cd226         | 2.87                    | 0.000                     |
| H2-Q8         | 2.74                    | 0.004                     |
| Coch          | 2.71                    | 0.012                     |
| Cd274         | 2.70                    | 0.003                     |
| Crtam         | 2.68                    | 0.010                     |
| Dcn           | 2.66                    | 0.019                     |
| Crim1         | 2.58                    | 0.002                     |
| 2610528A11Rik | 2.54                    | 0.000                     |
| Ntrk3         | 2.49                    | 0.002                     |
| Cdh17         | 2.39                    | 0.004                     |
| H2-DMb2       | 2.37                    | 0.022                     |
| Penk          | 2.20                    | 0.004                     |
| Il12rb2       | 2.15                    | 0.000                     |
| Gzmc          | 2.14                    | 0.018                     |
| Lrp1          | 2.08                    | 0.006                     |
| Il15ra        | 2.05                    | 0.039                     |
